# Supplementary material
Source: publisher site journal article supplement (https://www.spandidos-publications.com/8476/downloadSupplementary)
Supplement: Supplementary file 1 [file downloadSupplementary]

Table SI. Specific primers for reverse transcription-quantitative PCR and guide RNA sequences.

| Gene name                     | Primer sequence (5'-3')      |
|-------------------------------|------------------------------|
| Mouse GPX4                    | F: TGTGCATCCCGCGATGATT       |
|                               | R: CCCTGTACTTATCCAGGCAGA     |
| Mouse ACSL4                   | F: CTCACCATTATATTGCTGCCTGT   |
|                               | R: TCTCTTTGCCATAGCGTTTTTCT   |
| Mouse IL-6                    | F: ACAAAGCCAGAGTCCTTCAGAGAG  |
|                               | R: TTGGATGGTCTTGGTCCTTAGCCA  |
| Mouse TNF- $\alpha$           | F: TCCCCAAAGGGATGAGAAG       |
|                               | R: CACTTGGTGGTTTGCTACGA      |
| Mouse IL-1 $\beta$            | F: ACTGTGAAATGCCACCTTTTG     |
|                               | R: TGTTGATGTGCTGCTGTGAG      |
| Mouse MCP-1                   | F: GCTCTCTCTTCCTCCACCAC      |
|                               | R: ACAGCTTCTTTGGGACACCT      |
| Mouse HO-1                    | F: AAGCCGAGAATGCTGAGTTCA     |
|                               | R: GCCGTGTAGATATGGTACAAGGA   |
| Mouse PTGS2                   | F: TTCAACACACTCTATCACTGGC    |
|                               | R: AGAAGCGTTTGCGGTACTCAT     |
| Mouse SLC7A11                 | F: GGCACCGTCATCGGATCAG       |
|                               | R: CTCCACAGGCAGACCAGAAAA     |
| Mouse NQO1                    | F: AGGATGGGAGGTA CT CGAATC   |
|                               | R: AGGCGTCCTTCCTTATATGCTA    |
| Mouse $\beta$ -actin          | F: GAGACCTTCAACACCCAGC       |
|                               | R: ATGTCACGCACGATTTCCC       |
| Mouse GSK3 $\beta$<br>sgRNA-1 | F: CACCGCTTGCAGCTCTCCGCAAAGG |
|                               | R: AAACCCTTTGCGGAGAGCTGCAAGC |
| Mouse GSK3 $\beta$<br>sgRNA-2 | F: CACCGTCTCGATGGCAGATTCCAA  |
|                               | R: AAAGTTGGAATCTGCCATCGAGAC  |

F, forward; R, reverse; GPX4, glutathione peroxidase 4; ACSL4, Acyl-CoA synthetase long-chain family member 4; MCP-1, monocyte chemoattractant protein-1; HO-1, heme oxygenase-1; PTGS2, prostaglandin-endoperoxide synthase 2; SLC7A11, solute carrier family 7 member 11; NQO1, NAD(P)H quinone dehydrogenase 1; GSK3 $\beta$ , glycogen synthase kinase 3 $\beta$ ; sgRNA, single guide RNA.

Table SII. Antibodies for western blotting.

| Proteins                     | Primary antibodies                                       | Secondary antibodies                                                      |
|------------------------------|----------------------------------------------------------|---------------------------------------------------------------------------|
| KIM-1                        | 1:1,000 (cat. no. AF1817; R&D Systems, Inc.)             | Anti-Goat IgG (cat. no. A0108; Beyotime Institute of Biotechnology)       |
| NGAL                         | 1:1,000 (cat. no. ab63929; Abcam)                        | Anti-Rabbit IgG (cat. no. A0208; Beyotime Institute of Biotechnology)     |
| Phospho-GSK-3 $\beta$ (Ser9) | 1:1,000 (cat. no. 9323; Cell Signaling Technology, Inc.) | Anti-Rabbit IgG (cat. no. A0208; Beyotime Institute of Biotechnology)     |
| GSK3 $\beta$                 | 1:1,000 (cat. no. 22104-1-AP; Proteintech Group, Inc.)   | Anti-Rabbit IgG (cat. no. A0208; Beyotime Institute of Biotechnology)     |
| NRF2                         | 1:1,000 (cat. no. 16396-1-AP; Proteintech Group, Inc.)   | Anti-Rabbit IgG (cat. no. A0208; Beyotime Institute of Biotechnology)     |
| Cleaved caspase3             | 1:1,000 (cat. no. 9664; Cell Signaling Technology, Inc.) | HRP-Anti-Rabbit IgG (cat. no. A0208; Beyotime Institute of Biotechnology) |
| Caspase-3                    | 1:1,000 (cat. no. 9662; Cell Signaling Technology, Inc.) | HRP-Anti-Rabbit IgG (cat. no. A0208; Beyotime Institute of Biotechnology) |
| RIP3                         | 1:1,000 (cat. no. 68786-2-Ig; Proteintech Group, Inc.)   | Anti-Mouse IgG (cat. no. A0206; Beyotime Institute of Biotechnology)      |
| Phospho-RIP3 (Ser232)        | 1:1,000 (cat. no. 87148-1-RR; Proteintech Group, Inc.)   | HRP-Anti-Rabbit IgG (cat. no. A0208; Beyotime Institute of Biotechnology) |
| MPO                          | 1:1,000 (cat. no. AF3667; R&D Systems, Inc.)             | Anti-Goat IgG (cat. no. A0108; Beyotime Institute of Biotechnology)       |
| GPX4                         | 1:1,000 (cat. no. 14432-1-AP; Proteintech Group, Inc.)   | Anti-Rabbit IgG (cat. no. A0208; Beyotime Institute of Biotechnology)     |
| ATPB                         | 1:1,000 (cat. no. 17247-1-AP; Proteintech Group, Inc.)   | Anti-Rabbit IgG (cat. no. A0208; Beyotime Institute of Biotechnology)     |
| SOD2                         | 1:1,000 (cat. no. 24127-1-AP; Proteintech Group, Inc.)   | Anti-Rabbit IgG (cat. no. A0208; Beyotime Institute of Biotechnology)     |
| HO-1                         | 1:1,000 (cat. no. 10701-1-AP; Proteintech Group, Inc.)   | Anti-Rabbit IgG (cat. no. A0208; Beyotime Institute of Biotechnology)     |
| $\beta$ -actin               | 1:1,000 (cat. no. 66009-1-Ig; Proteintech Group, Inc.)   | Anti-Mouse IgG (cat. no. A0206; Beyotime Institute of Biotechnology)      |

GPX4, glutathione peroxidase 4; SOD2, superoxide dismutase 2; HO-1, heme oxygenase 2; MPO, myeloperoxidase; NGAL, neutrophil gelatinase-associated lipocalin.

Table III. Antibodies used in immunofluorescence and immunohistochemistry.

| Proteins                    | Primary antibodies                                      | Secondary antibodies                                                                                                                      |
|-----------------------------|---------------------------------------------------------|-------------------------------------------------------------------------------------------------------------------------------------------|
| NRF2                        | 1:100 (cat. no. 16396-1-AP; Proteintech Group, Inc.)    | Donkey anti-Rabbit IgG (H+L) Highly Cross-Adsorbed Secondary Antibody, Alexa Fluor 488 (cat. no. A-21206; Thermo Fisher Scientific, Inc.) |
| Lotus tetragonolobus lectin | 1:200 (cat. no. FL-1321; Vector Laboratories, Inc.)     |                                                                                                                                           |
| 4-hydroxynonenal            | 1:100 (cat. no. A26085; ABclonal Biotech Co., Ltd.)     | Donkey anti-Rabbit IgG (H+L) Highly Cross-Adsorbed Secondary Antibody, Alexa Fluor 488 (cat. no. A-21206; Thermo Fisher Scientific, Inc.) |
| F4/80                       | 1:100 (cat. no. 70076; Cell Signaling Technology, Inc.) | SignalStain® Boost IHC Detection Reagent (HRP, Rabbit) (cat. no. 8114S; Cell Signaling Technology, Inc.)                                  |
